# Supplementary material for: High energy density liquid state asymmetric supercapacitor devices using Co–Cr–Ni–Fe–Mn high entropy alloy
Source: Royal Society of Chemistry journal article supplement (doi:10.1039/d3ma00327b), 2023-01-01
Supplement: d3ma00327b1.pdf [file d3ma00327b1.pdf]

## Supporting Information

### High energy density liquid state asymmetric supercapacitor device using Co-Cr-Ni-Fe-Mn High Entropy Alloy

Gobinda C. Mohanty<sup>a</sup>, Chinmayee C. Gowda<sup>a</sup>, Pooja Gakhad<sup>b</sup>, M. Sanjay<sup>c</sup>, Suman Sarkar<sup>d</sup>, Koushik Biswas<sup>a,c\*</sup>,  
Abhishek Singh<sup>b\*</sup> and Chandra S. Tiwary<sup>a,c\*</sup>

E-mail: [k\\_biswas@metal.iitkgp.ac.in](mailto:k_biswas@metal.iitkgp.ac.in), [abhishek@iisc.ac.in](mailto:abhishek@iisc.ac.in) and [chandra.tiwary@metal.iitkgp.ac.in](mailto:chandra.tiwary@metal.iitkgp.ac.in)

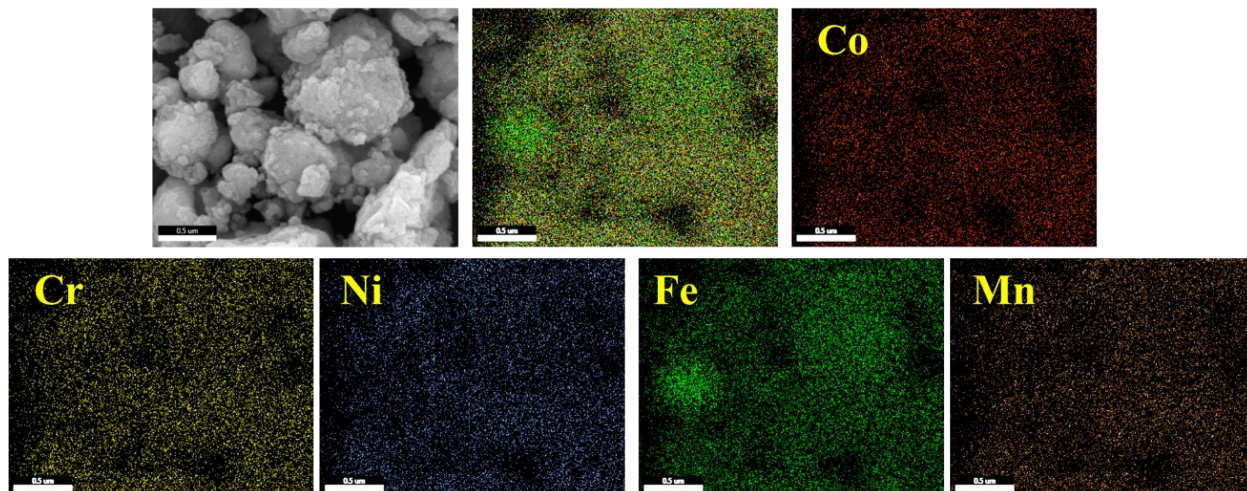

**Figure S1:** Elemental mapping of all elements (Co, Cr, Ni, Fe and Mn).

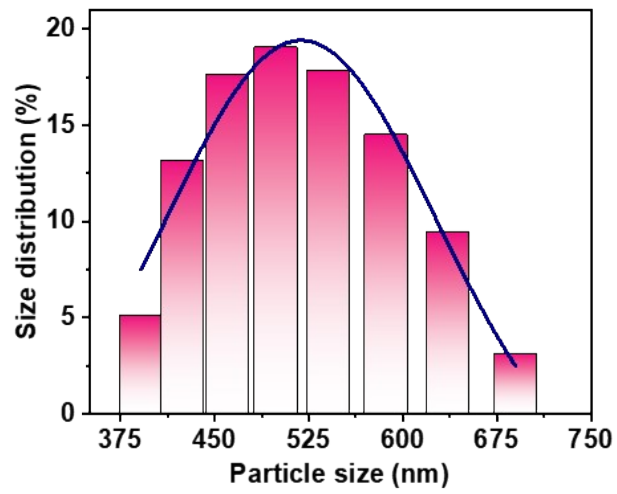

**Figure S2:** Particle size distribution of CCNFM HEA powder obtained from DLS.

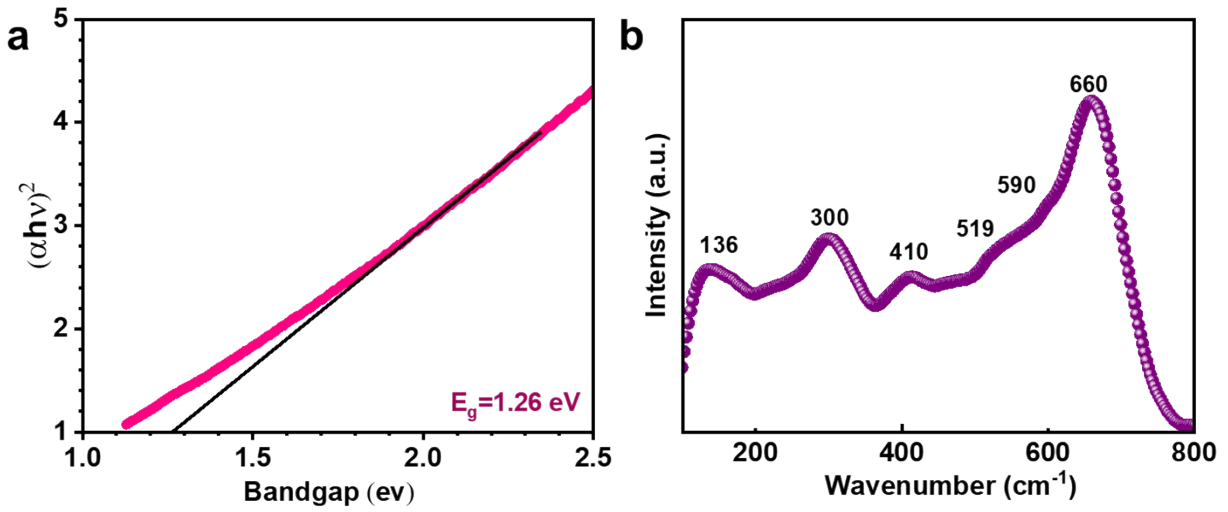

**Figure S3:** (a) Tauc plot of ball milled HEA samples and (b) Raman spectroscopic results for the same.

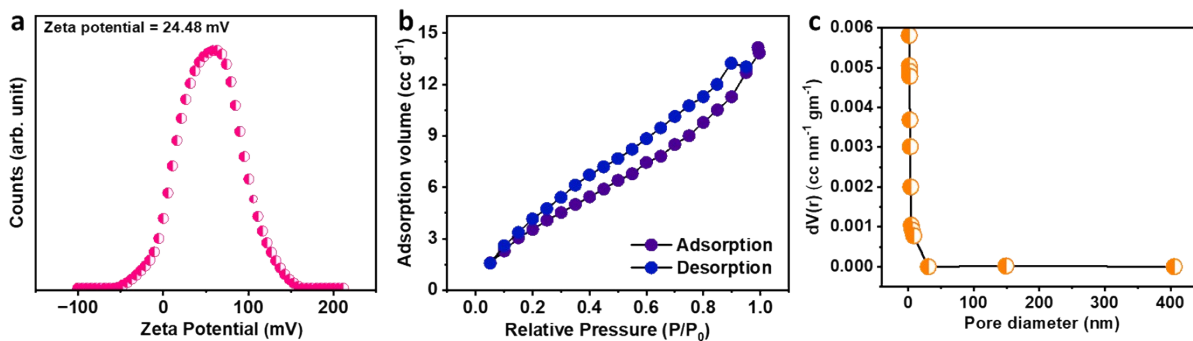

**Figure S4:** (a) Zeta potential and (b) BET N<sub>2</sub> adsorption and desorption curves obtained a specific surface area of 25 m<sup>2</sup> g<sup>-1</sup>. (c) Pore volume vs. pore diameter.

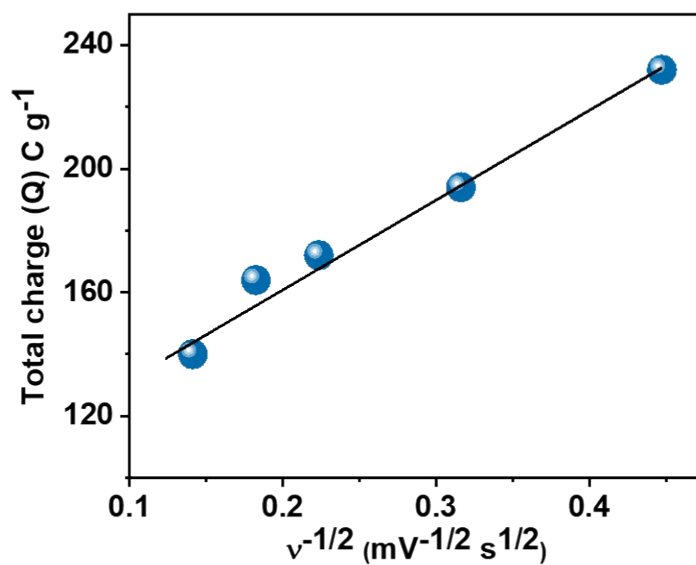

**Figure S5:**  $Q(t)$  vs  $v^{-\frac{1}{2}}$  for evaluating  $Q_s$ .

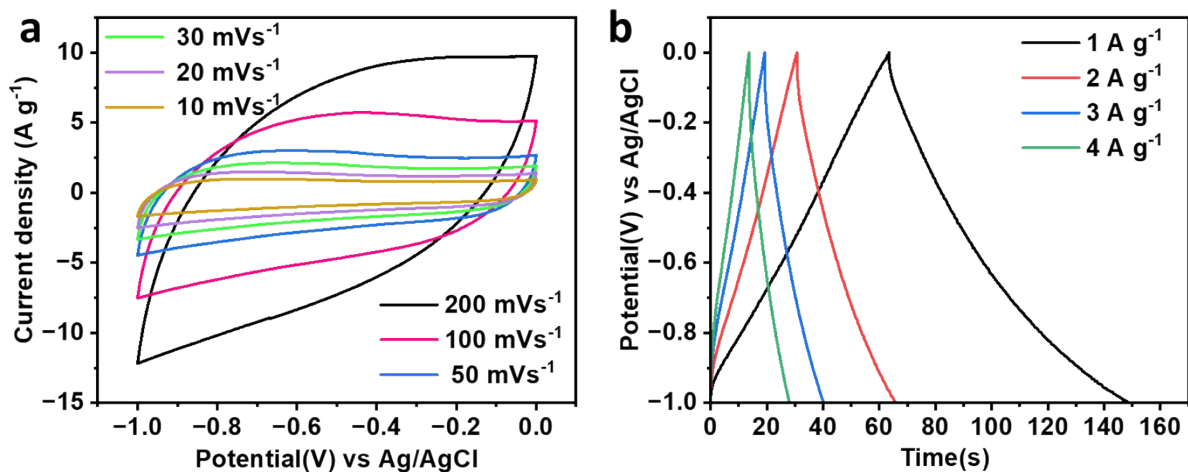

**Figure S6:** CV and GCD of activated carbon anode electrode at 3M KOH.

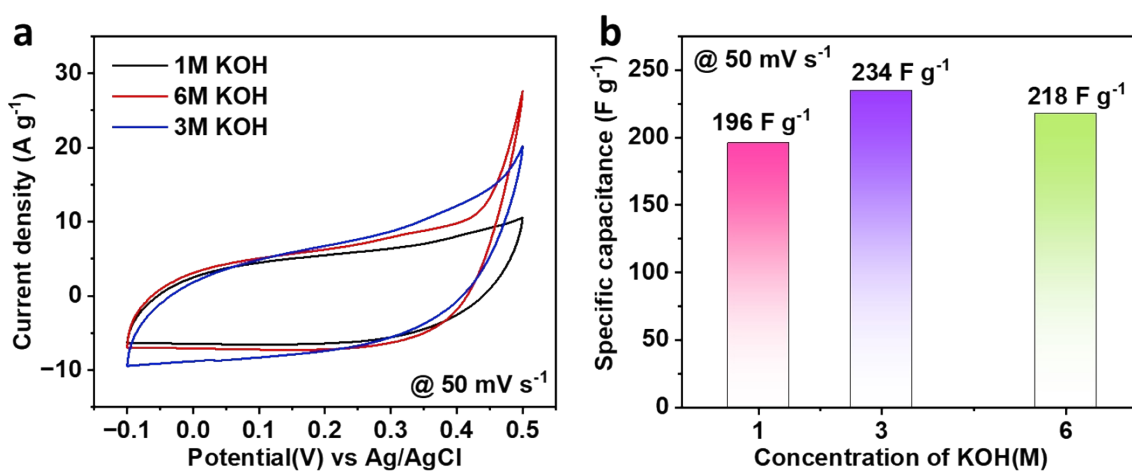

**Figure S7:** (a) CV of FCNCM HEA electrode at different concentration of aqueous KOH electrolyte at 50 mV s<sup>-1</sup>, (b) Specific capacitance vs. concentration at 50 mV s<sup>-1</sup>.

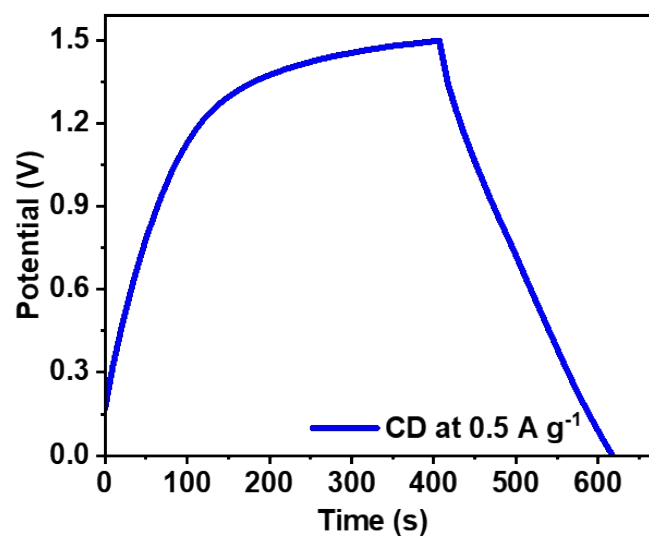

**Figure S8:** Charge discharge at  $0.5 \text{ A g}^{-1}$  for ASC liquid state device.

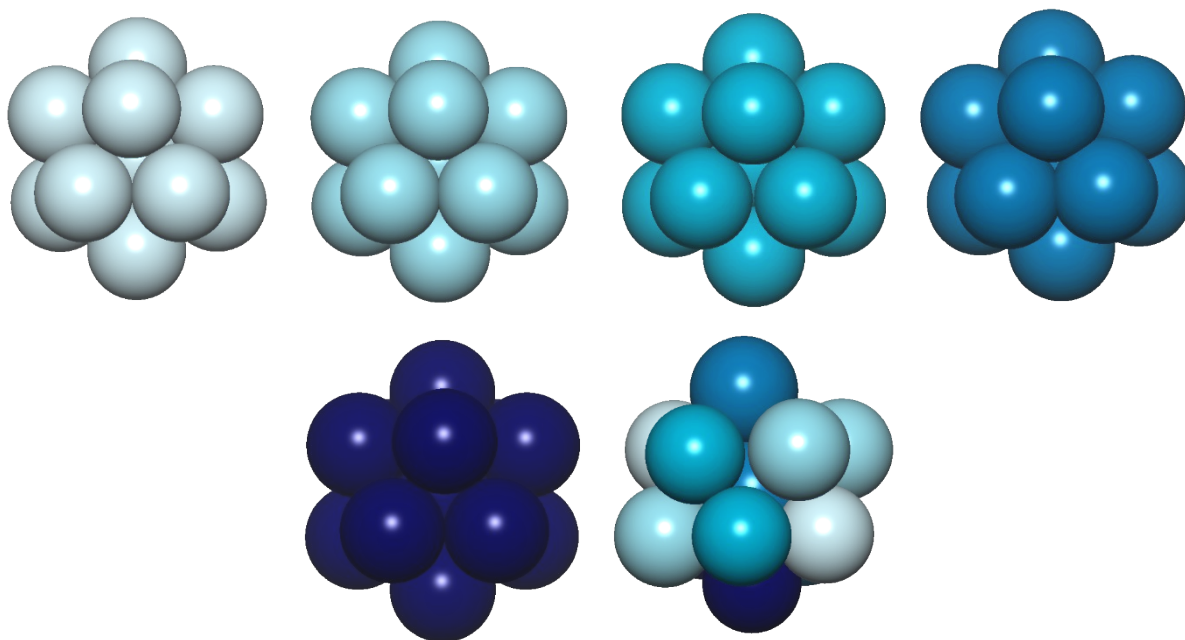

**Figure S9:** 13-atom icosahedron of Co, Cr, Fe, Mn (top left to right), Ni (bottom left) and CoCrFeMnNi HEA (bottom right).

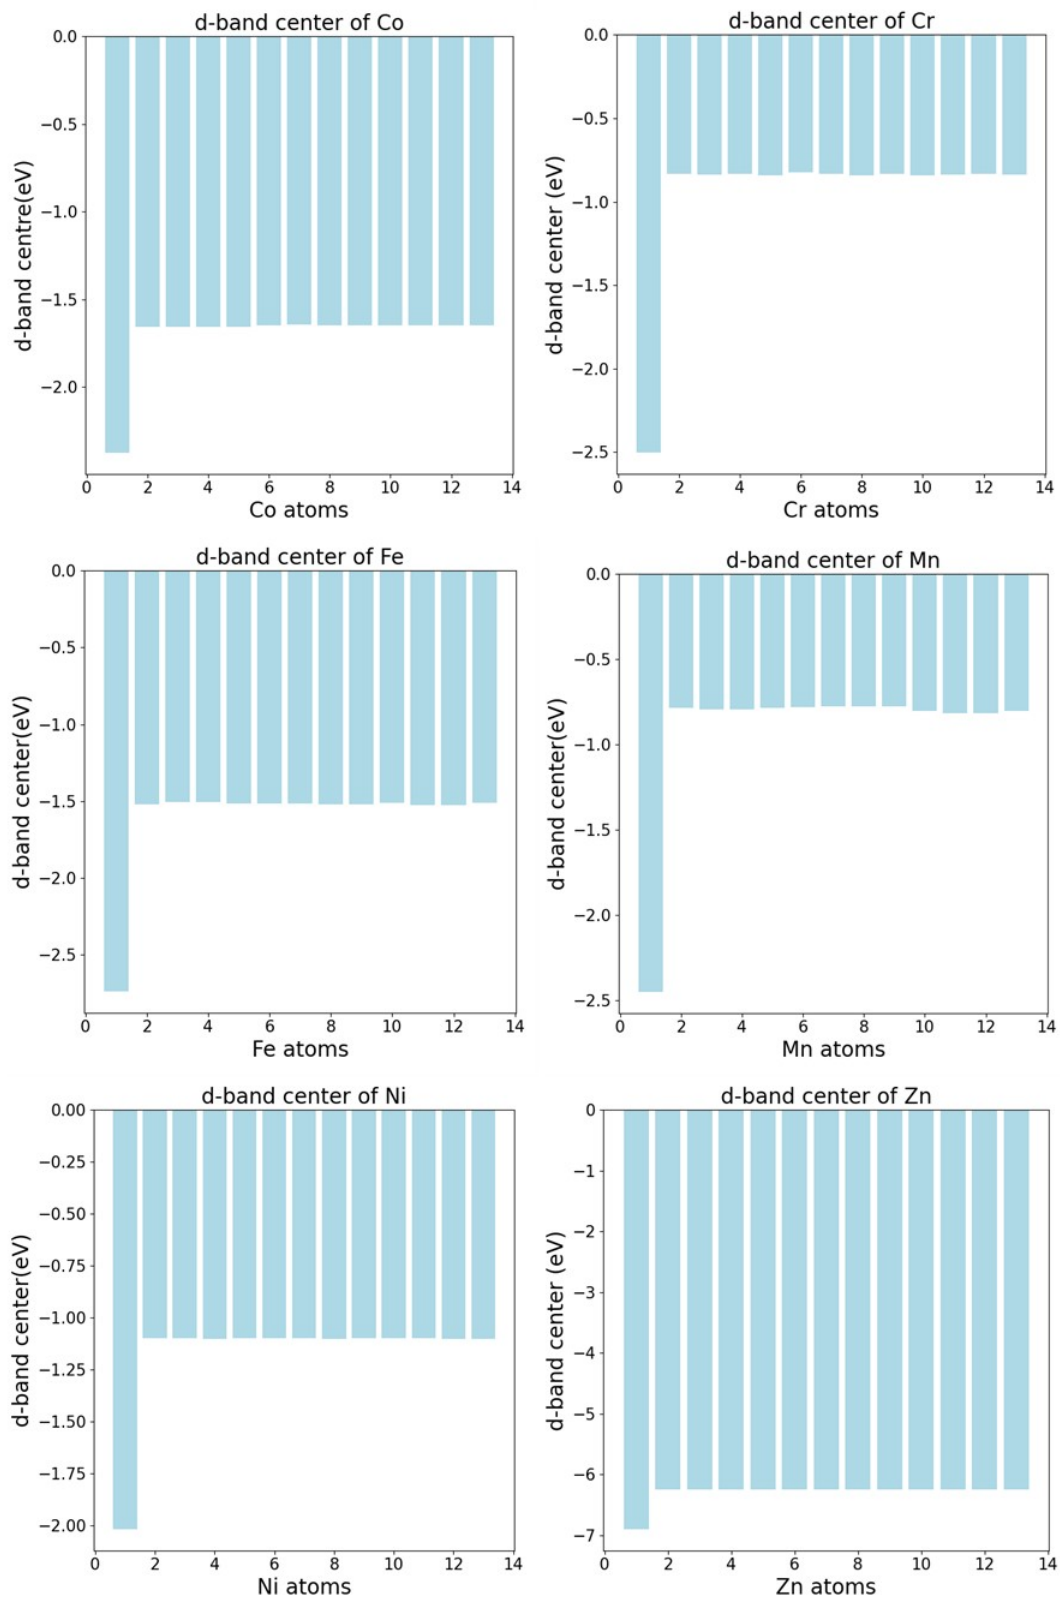

**Figure S10:** *d*-band center.

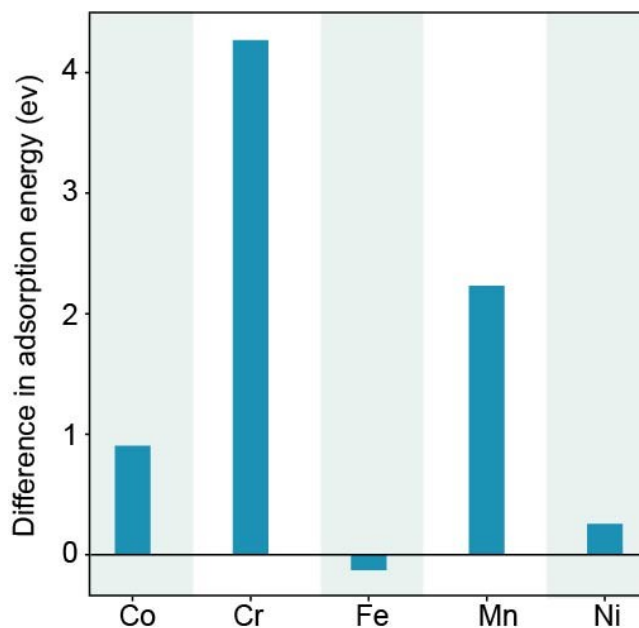

**Figure S11:** Plot showing adsorption energy difference in individual elements.

**Table 1:** Comparison among various liquid state asymmetric devices

| Electrode material                                     | Device type | Energy density (Wh/kg) | Power density (W/kg) | Cyclic stability        | Ref. |
|--------------------------------------------------------|-------------|------------------------|----------------------|-------------------------|------|
| Mn <sub>3</sub> (PO <sub>4</sub> ) <sub>2</sub> GF//AC | Asymmetric  | 7.6                    | 360                  | 96% after 10k cycle     | [3]  |
| CaCu <sub>2</sub> O <sub>3</sub> //AC                  | Asymmetric  | 11.8                   | 362                  | 90.9 % after 10k cycles | [4]  |
| CuCo <sub>2</sub> O <sub>4</sub> //CNF                 | Asymmetric  | 21.5                   | 400                  | 91.1% after 5k cycles   | [5]  |
| FeNiCoMnMg HEA-NPs/ACNFs                               | Symmetric   | 21.7                   | -                    | 85% after 2k cycles     | [6]  |
| HEO/f-CSAC                                             | Symmetric   | 3.55                   | 862.5                | 94.4% after 500 cycles  | [7]  |
| ZnCO//AC                                               | Asymmetric  | 35.6                   | 187.6                | 90% after 3k cycles     | [8]  |
| NiNTAS@ Fe <sub>2</sub> O <sub>3</sub> //              | Asymmetric  | 34.1                   | 3197.7               | 92.3% after 5k cycle    | [9]  |

|                                                             |                   |           |            |                              |                  |
|-------------------------------------------------------------|-------------------|-----------|------------|------------------------------|------------------|
| NiNTAS@MnO <sub>2</sub>                                     |                   |           |            |                              |                  |
| Ni-Co-PO <sub>4</sub> //AC                                  | Asymmetric        | 32.5      | 600        | 80.4% after 5k cycles        | [10]             |
| NiCo <sub>2</sub> O <sub>4</sub> @MnO <sub>2</sub><br>// AC | Asymmetric        | 35        | 163        | 71% after 5k cycles          | [11]             |
| CoMoO <sub>4</sub> @<br>NiMoO <sub>4</sub> // AC            | Asymmetric        | 28.7      | 262        | 99% after 3k cycles          | [12]             |
| MnO <sub>2</sub> /rGO//AC                                   | Asymmetric        | 25.14     | 250        | -                            | [13]             |
| <b>FeCoNiCrMn//<br/>AC</b>                                  | <b>Asymmetric</b> | <b>21</b> | <b>307</b> | <b>88.5% after 5k cycles</b> | <b>This Work</b> |
